# Supplementary material for: Viral capsid structural assembly governs the reovirus binding interface to NgR1
Source: Royal Society of Chemistry journal article supplement (doi:10.1039/d4nh00315b), 2024-01-01
Supplement: d4nh00315b1.pdf [file d4nh00315b1.pdf]

Supplementary Materials for  
Viral capsid structural assembly governs the reovirus binding  
interface to NgR1

Rita dos Santos Natividade,<sup>1,†</sup> Andra C. Dumitru,<sup>1,†</sup> Alessandro Nicoli,<sup>2,3</sup> Michael  
Strebl,<sup>4</sup> Danica M. Sutherland,<sup>5,6</sup> Olivia L. Welsh,<sup>5,6</sup> Mustafa Ghulam,<sup>2</sup> Thilo  
Stehle,<sup>4</sup> Terence S. Dermody,<sup>5,6,7</sup> Antonella Di Pizio,<sup>2,3,\*</sup> Melanie Koehler,<sup>1,2,\*</sup> and  
David Alsteens,<sup>1,8,\*</sup>

<sup>1</sup> Louvain Institute of Biomolecular Science and Technology, Université catholique de Louvain, Louvain-la-Neuve, Belgium

<sup>2</sup> Leibniz Institute for Food Systems Biology at the Technical University of Munich, Freising, Germany

<sup>3</sup> Chemoinformatics and Protein Modelling, Department of Molecular Life Sciences, School of Life Sciences, Technical University of Munich, 85354 Freising, Germany

<sup>4</sup> Interfaculty Institute of Biochemistry, University of Tübingen, Tübingen, Germany

<sup>5</sup> Department of Pediatrics, University of Pittsburgh School of Medicine, Pittsburgh, Pennsylvania, USA

<sup>6</sup> Institute of Infection, Inflammation, and Immunity, UPMC Children's Hospital of Pittsburgh, Pittsburgh, Pennsylvania, USA

<sup>7</sup> Department of Microbiology and Molecular Genetics, University of Pittsburgh School of Medicine, Pittsburgh, Pennsylvania, USA

<sup>8</sup> WELBIO department, WEL Research Institute, 1300 Wavre, Belgium

\*Corresponding authors: David Alsteens, david.alsteens@uclouvain.be; Melanie Koehler, m.koehler.leibniz-lsb@tum.de; Antonella Di Pizio, a.dipizio.leibniz-lsb@tum.de

†These authors contributed equally to this work.

This PDF file includes:

Figs. S1 to S9  
Table S1 to S3

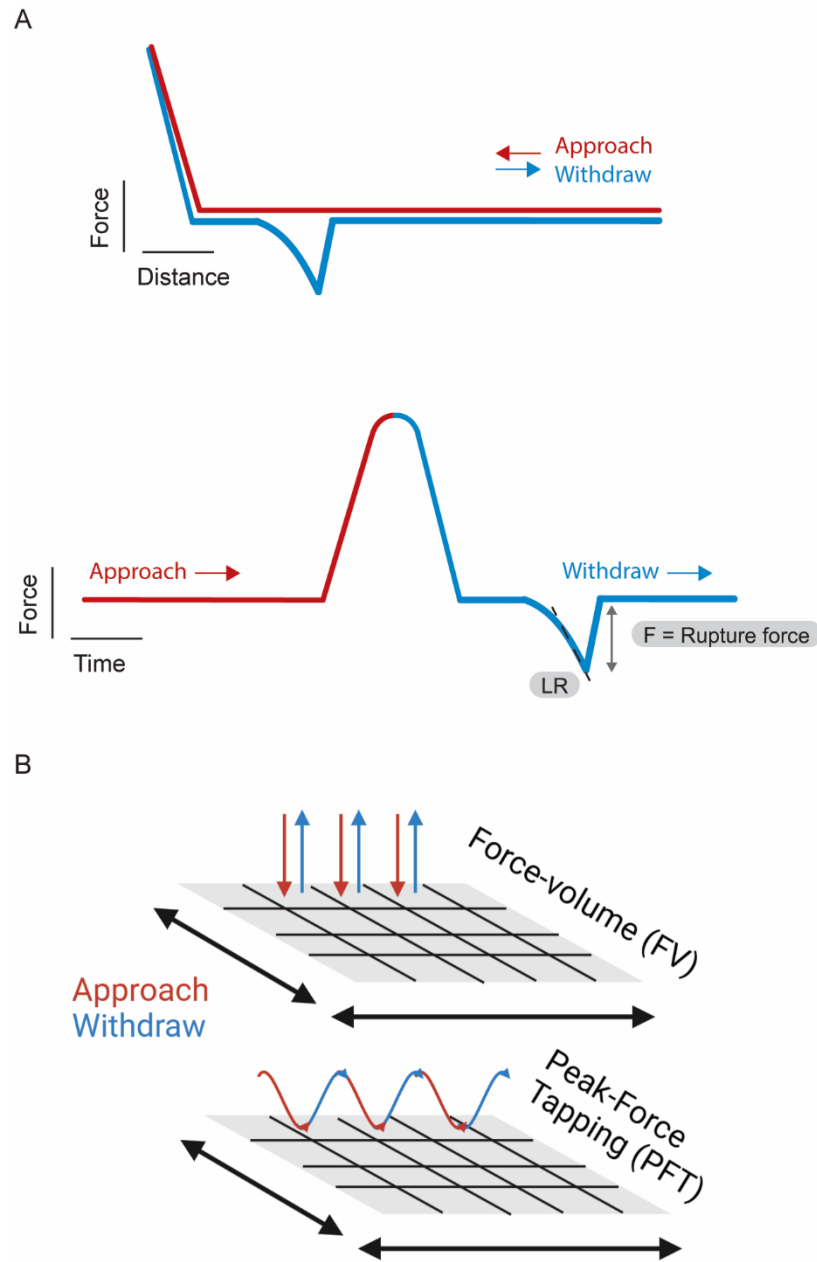

**Fig. S1. Schematics of force curves and force mapping.** (A) Each pixel, Force-distance (FD) curves (top curve) and Force-time curves (bottom curve) are recorded. The curves represent a specific adhesion event. Rupture forces are collected from the peak of an unbinding event. Loading rate (LR) corresponds to the slope of the curve just before rupture of the bond. (B) In force mapping, an array of force curves is collected. The AFM can be operated in FV mode, in which the tip follows a linear motion, or in PFT mode, with a sinusoidal movement of the tip.

## hNgR1 - assembled hexamers

### FFV

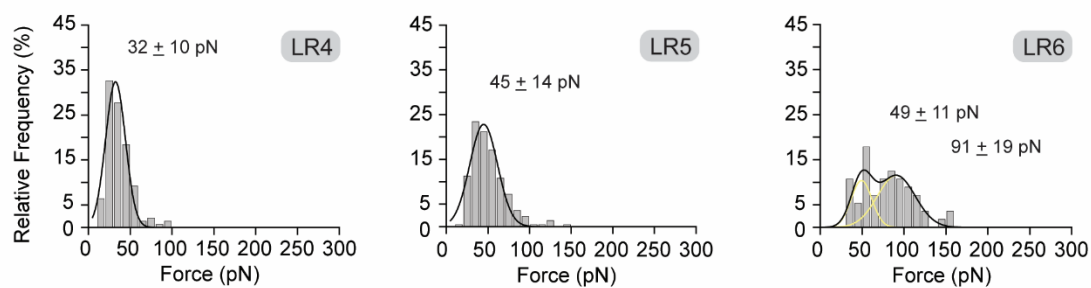

### PFT

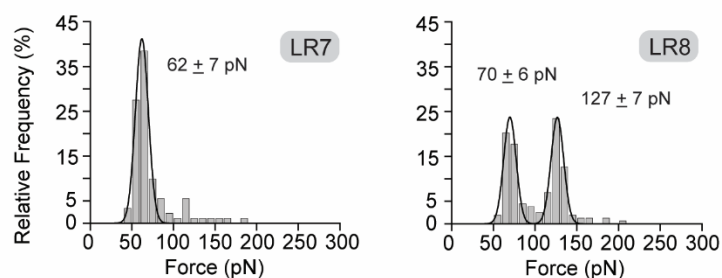

**Fig. S2.** Extraction of rupture forces of the interaction between hNgR1 and self-assembled  $\mu_1\sigma_3\bar{3}_3$  heterohexamers. Rupture forces were collected from probing the assembled hexamers in different modes: Fast Force-volume (FFV; top three histograms) and Peak-Force Tapping (PFT; bottom two histograms). LRs were divided into different ranges (LR4-LR8). The distribution of rupture forces for each LR is plotted as histograms and fitted by multipeak Gaussian Fits. The maximum values of all force peaks are indicated.

### hNgR1 - single hexamer

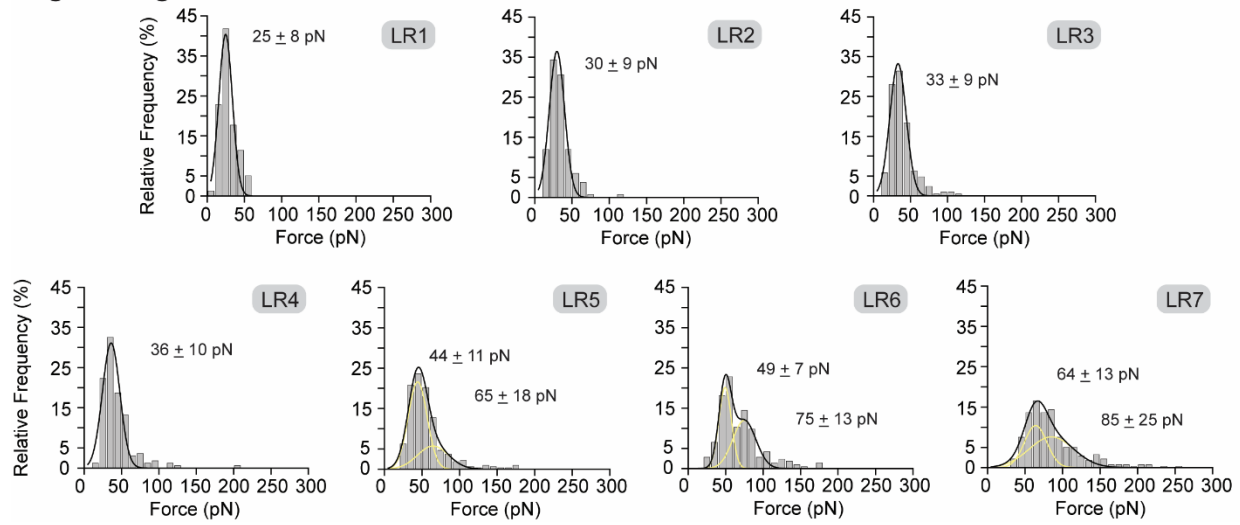

Fig. S3. Extraction of rupture forces of hNgR1 – single hexamer. LRs were divided into different ranges (LR1-LR7). The distribution of rupture forces for each LR is plotted as histograms and fitted by multi-peak Gaussian Fits. The maximum values of all force peaks are indicated.



|                                                                                                                  | $k_{\text{off}} [\text{s}^{-1}]$ | $x_b [\text{nm}]$ | $k_{\text{on}} [\mu\text{M}^{-1} \text{s}^{-1}]$ | $K_D [\text{nM}]$   |
|------------------------------------------------------------------------------------------------------------------|----------------------------------|-------------------|--------------------------------------------------|---------------------|
|  $\sigma 3\mu 1 - \text{hNgR1}$ | $0.32 \pm 0.21$                  | $0.86 \pm 0.08$   | $2.17 \pm 0.20$                                  | $147.25 \pm 110.52$ |
|  $\text{mNgR1} - \text{T1L}$    | $0.65 \pm 0.35$                  | $0.73 \pm 0.07$   | $6.94 \pm 0.23$                                  | $93.51 \pm 53.63$   |
|  $\sigma 3\mu 1 - \text{mNgR1}$ | $0.23 \pm 0.12$                  | $0.76 \pm 0.05$   | $2.99 \pm 0.46$                                  | $76.80 \pm 51.86$   |

**Fig. S4.** Kinetic parameters of the interactions between reovirus and hNgR1/mNgR1. Overview of the estimated kinetic parameters and their associated errors for the interactions between (represented by schematics on the left): i) reovirus T1L particle binding to hNgR1, ii) hNgR1 binding to single heterohexamers, iii) reovirus T1L particle binding to mNgR1, and iv) hNgR1 binding to single heterohexamers. The BE fit (for simple ligand-receptor bond) provides average  $k_{\text{off}}$  and  $x_u$  values, whereas the least-squares fit of a monoexponential decay provides average values for the  $k_{\text{on}}$ . The  $K_D$  is calculated using  $k_{\text{off}}/k_{\text{on}}$ .

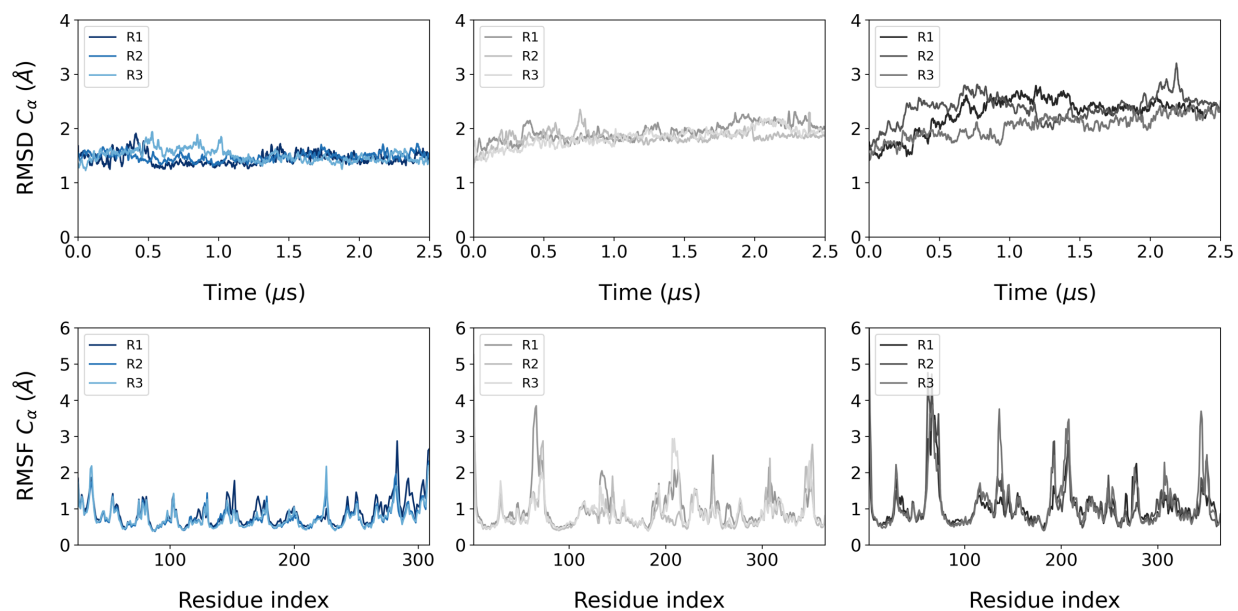

Fig. S5. Root Mean Square Deviation (RMSD, top panels) and Root Mean Square Fluctuations (RMSF, bottom panels) for hNgR1 and  $\sigma 3$ . RMSD and RMSF of the backbone  $C_\alpha$  of hNgR1 (blue lines),  $\sigma 3_A$  (light grey lines) and  $\sigma 3_B$  (dark grey lines) during the MD simulations. R1, R2, and R3 denote MD replicas.

### T1L - mNgR1

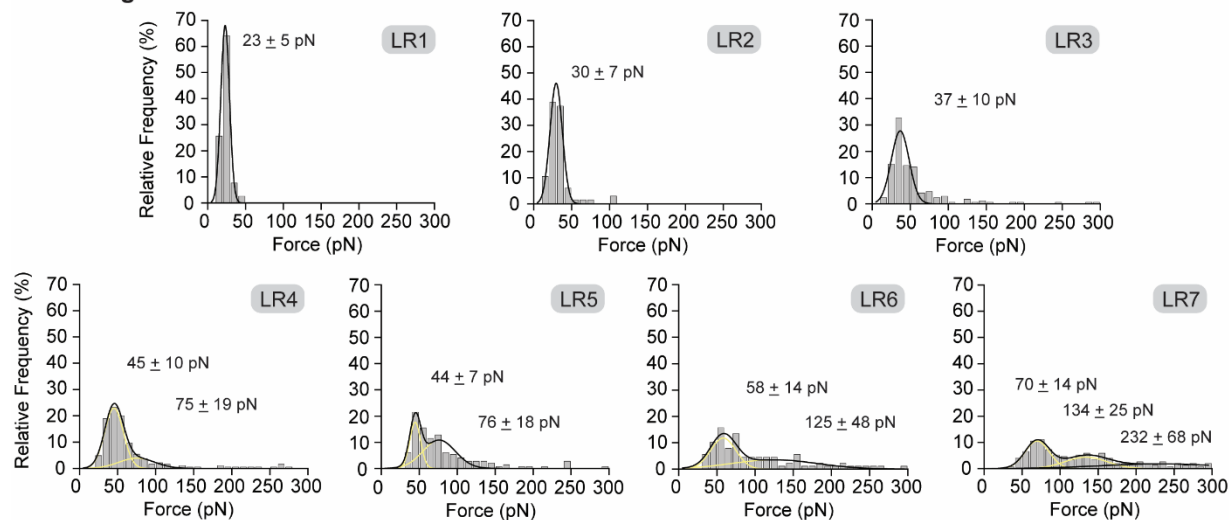

### mNgR1 - single hexamer

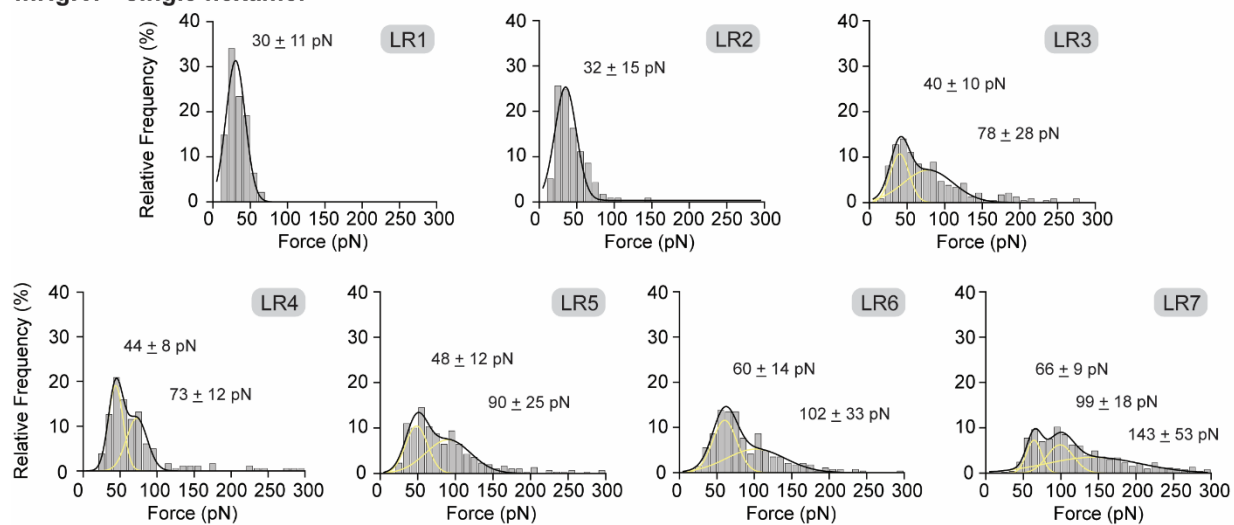

Fig. S6. Extraction of rupture forces of T1L – mNgR1 and mNgR1 – single hexamer. LRs were divided into different ranges (LR1-LR7). The distribution of rupture forces for each LR is plotted as histograms and fitted by multipeak Gaussian Fits. The maximum values of all force peaks are indicated.

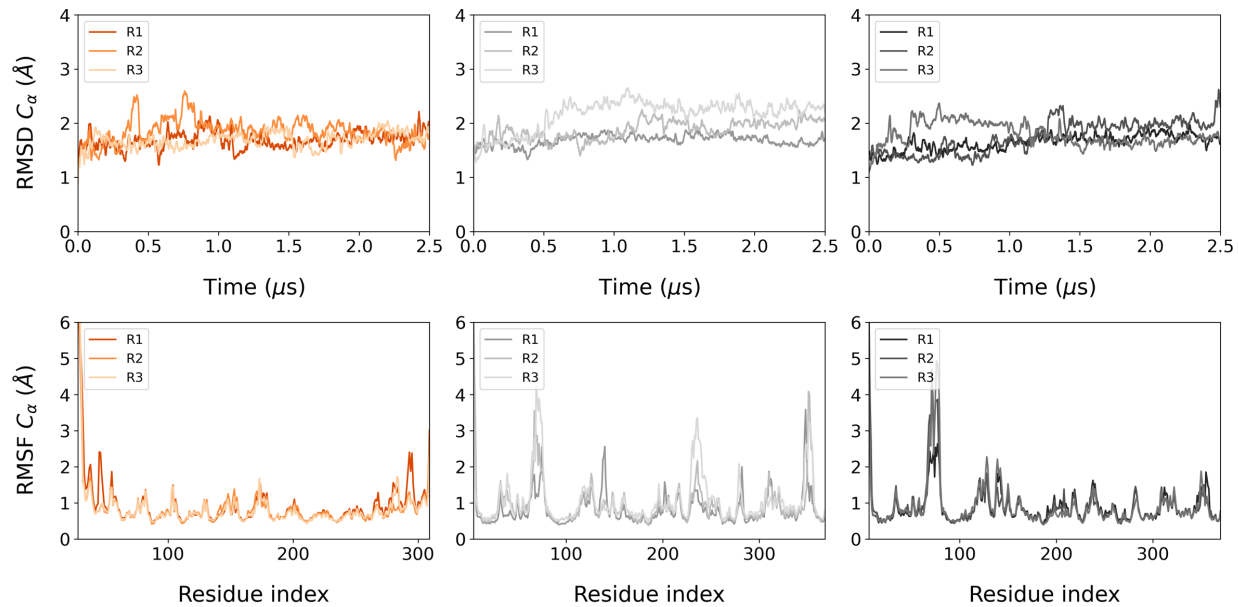

Fig. S7. Root Mean Square Deviation (RMSD, top panels) and Root Mean Square Fluctuations (RMSF, bottom panels) for mNgR1 and  $\sigma 3$ . RMSD and RMSF of the backbone C $\alpha$  of mNgR1 (orange lines),  $\sigma 3_A$  (light grey lines) and  $\sigma 3_B$  (dark grey lines) during the MD simulations. R1, R2, and R3 denote MD replicas.



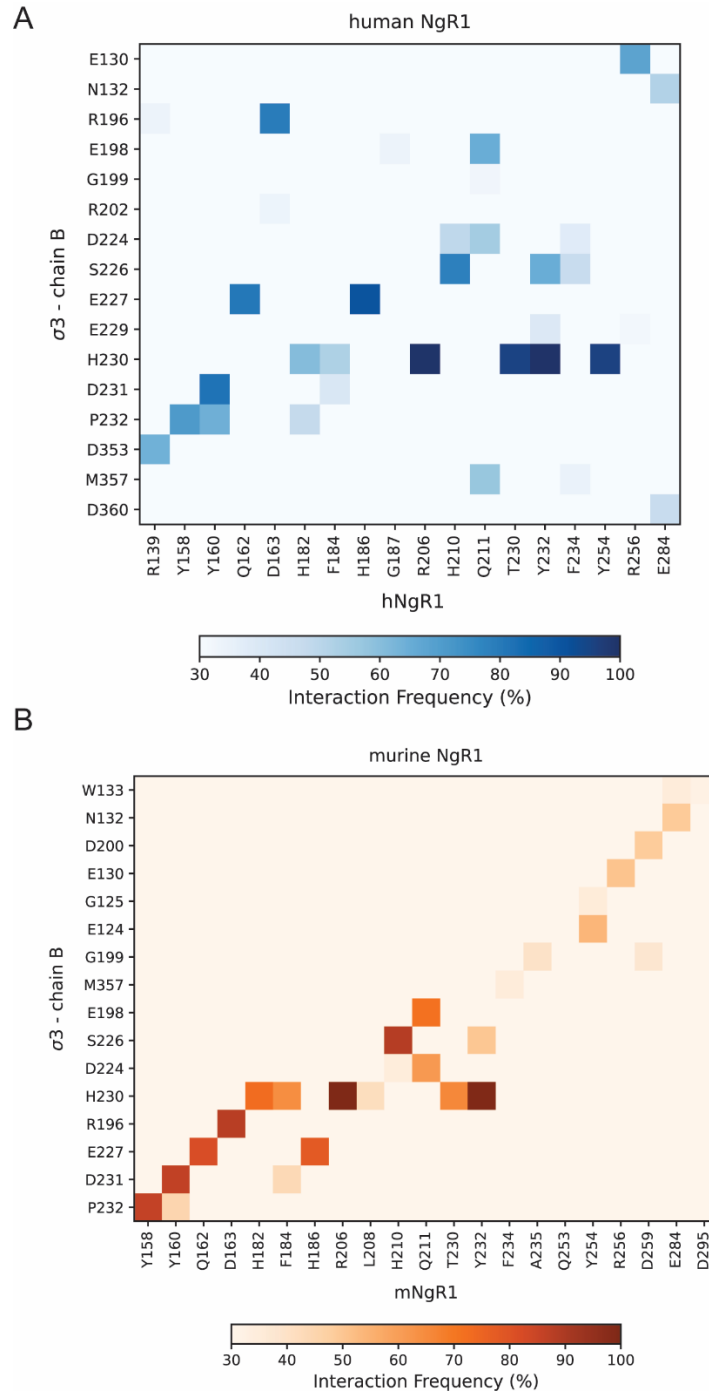

**Fig. S8. Interactions occurring in the NgR1 complex with  $\sigma 3_B$ .** Interactions are shown for the hNgR1 complex (panel A) and mNgR1 complex (B). Cells of the heat maps are coloured according to the increased number of interactions, from white to dark blue (A) and dark orange (B).

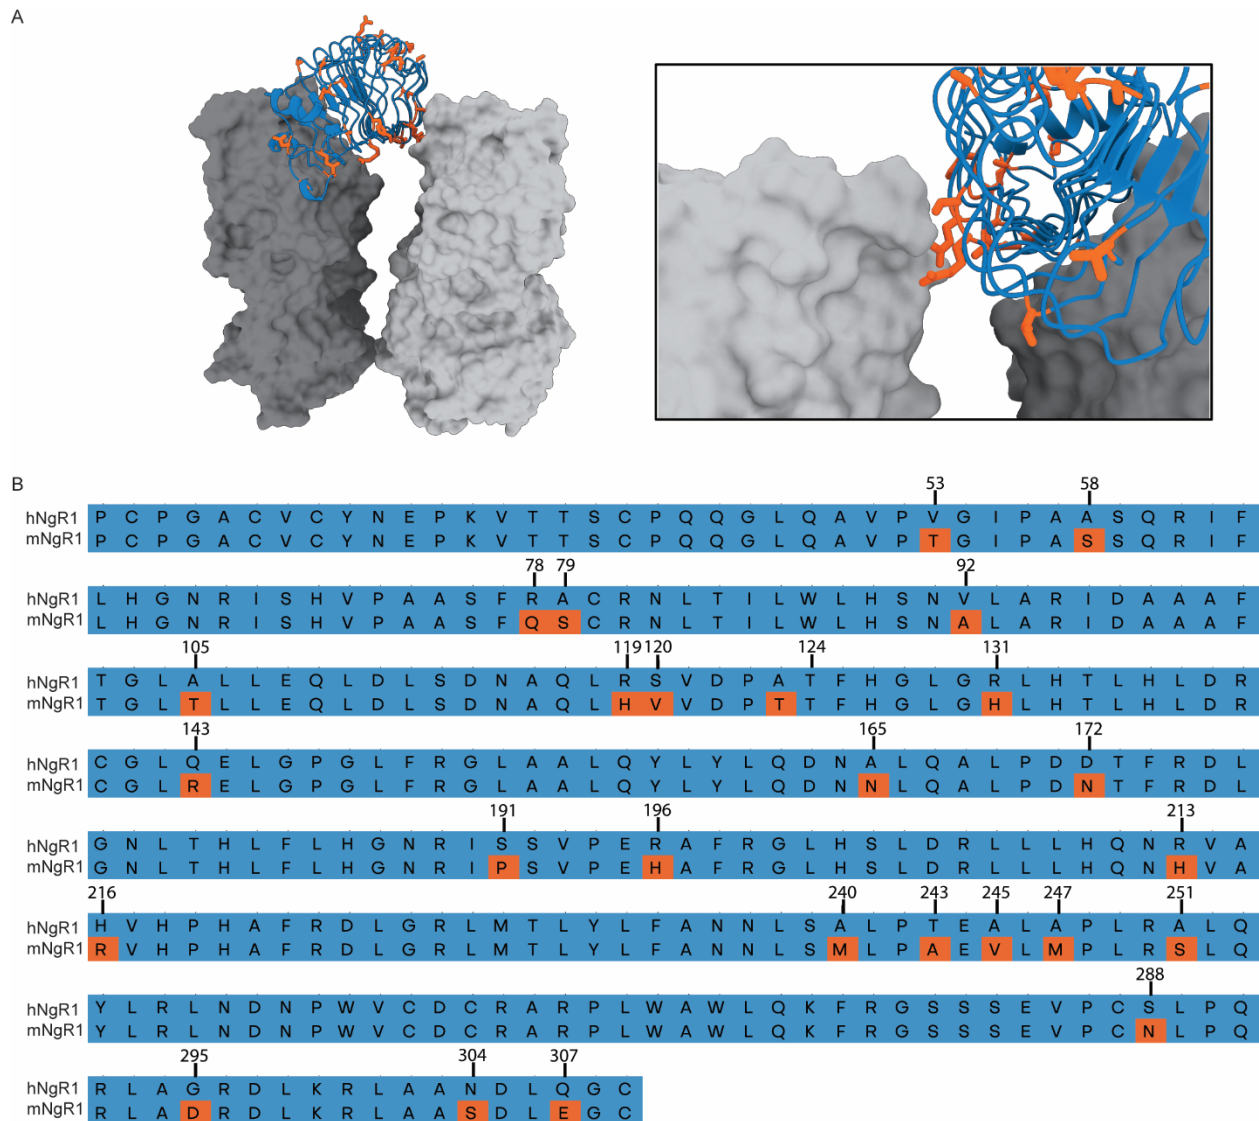

**Fig. S9. Overview of diverse residues involved in the NgR1-  $\sigma 3$  interaction.** (A) Structural representation of the complex of hNgR1 with two  $\sigma 3$  monomers. NgR1 is represented as blue cartoons, with regions involving diverse residues between human and murine NgR1 in orange, while  $\sigma 3_A$  and  $\sigma 3_B$  are shown as light and dark grey surfaces. A zoom-in on the interacting convex interface is reported on the right side of the figure. Residues that differ between hNgR1 and mNgR1 are shown as orange sticks. (B) Sequence alignment between human and murine NgR1.

Table S1. List of high frequent contacts conserved during the simulations between the human and murine NgR1 and  $\sigma 3_B$ .

| $\sigma 3_B$ | hNgR1 | mNgR1 | Frequency (%) | Interaction Type <sup>a</sup> | present initial structure |
|--------------|-------|-------|---------------|-------------------------------|---------------------------|
| E227         |       | Q162  | 80.5          | hbss, vdw                     | yes                       |
| E227         | Q162  |       | 82.0          | hbss, vdw                     | yes                       |
| D231         |       | Y160  | 86.4          | hbss, vdw                     | yes                       |
| D231         | Y160  |       | 81.9          | hbss, vdw                     | yes                       |
| H230         |       | R206  | 99.7          | pc, vdw, hbss                 | yes                       |
| H230         |       | Y232  | 99.4          | ts, vdw                       | yes                       |
| H230         | H182  |       | 60.6          | vdw                           | yes                       |
| H230         | R206  |       | 99.7          | pc, vdw, hbss                 | yes                       |
| H230         | T230  |       | 95.1          | vdw, hbss                     | yes                       |
| H230         | Y232  |       | 100.0         | ts, vdw                       | yes                       |

<sup>a</sup>Hydrogen Bonds (hb) backbone to backbone (bb) or side-chain to side-chain (ss); Salt bridges (sb); Pi-cation (pc), Pi-stacking (ps), T-stacking (ts) and van der Waals Interactions (vdw).

Table S2. List of contacts with a frequency higher than 40% between human and murine NgR1 and  $\sigma 3_A$  during the simulations.

| $\sigma 3_A$ | hNgR1 | mNgR1 | Frequency (%) | Interaction Type <sup>a</sup> | present initial structure |
|--------------|-------|-------|---------------|-------------------------------|---------------------------|
| D112         |       | R189  | 47,2          | sb, hbss                      | no                        |
| D112         | R189  |       | 43,3          | sb, hbss                      | no                        |
| S114         |       | R143  | 63,5          | vdw                           | no                        |
| E116         | R119  |       | 61,8          | sb, hbss                      | no                        |
| D117         |       | R143  | 46,9          | sb, hbss, vdw                 | no                        |
| D119         | R119  |       | 42,6          | sb, hbssB                     | no                        |
| R120         |       | E144  | 69,9          | sb, hbss                      | no                        |
| E130         |       | R216  | 41,5          | sb, hbss                      | no                        |
| E130         |       | R189  | 41,2          | sb, hbss                      | no                        |
| N132         |       | N237  | 74,7          | hbss, vdw                     | no                        |
| L134         |       | P261  | 57,8          | vdw                           | no                        |
| Q135         |       | N237  | 63,9          | hbss, vdw                     | no                        |
| R143         |       | Q291  | 56,4          | hbsb, vdw                     | no                        |
| I145         |       | Q291  | 55,3          | hbsb, vdw                     | no                        |
| D200         |       | R267  | 46,9          | sb, hbss                      | no                        |

<sup>a</sup>Hydrogen Bonds (hb) backbone to backbone (bb) or side-chain to side-chain (ss); Salt bridges (sb); Pi-cation (pc), Pi-stacking (ps), T-stacking (ts) and van der Waals interactions (vdw).

Table S3. Protonation states of histidine residues (HID is protonated in  $\delta$ , HIE in  $\epsilon$  and HSP is double protonated), protonated aspartate (ASH) and protonated glutamate (GLH) in the simulated structures.

| <b>Protein</b>                 | <b>HID</b>        | <b>HIE</b>                                                   | <b>HSP</b>    | <b>ASH</b> | <b>GLH</b> |
|--------------------------------|-------------------|--------------------------------------------------------------|---------------|------------|------------|
| <b>hNgR1</b>                   |                   | 65, 71, 89, 127, 133, 136, 182, 186, 202, 210, 216, 218, 220 |               |            |            |
| <b>mNgR1</b>                   | 89, 119, 131, 213 | 65, 71, 127, 182, 196, 202, 210, 218, 220                    | 133, 136, 186 | 163        | 284        |
| <b><math>\sigma 3_A</math></b> |                   | 9, 53, 67, 70, 71, 79, 94, 107, 146, 190, 230, 251, 256, 304 |               |            |            |
| <b><math>\sigma 3_B</math></b> |                   | 9, 53, 67, 70, 71, 79, 94, 107, 146, 190, 230, 251, 256, 304 |               |            |            |
